# Supplementary material for: The Impact of COVID-19 on Surgical Education: A Monocentric Survey of Residents Training in Surgical Specialties
Source: Research Square preprint supplement (doi:10.21203/rs.3.rs-602831/v1), 2021-06-18
Supplement: Supplementary file 1 [file 5accd05db564c61c36f596d1.docx]

Appendix 1

1. Quel était votre niveau de formation lors de la première vague de la pandémie de SARS-CoV2 (COVID19) au printemps 2020 ?
   1. R1
   2. R2
   3. R3
   4. R4
   5. R5
   6. R6
2. Quel est votre genre ?
   1. Homme
   2. Femme
   3. Je préfère ne pas le spécifier.
3. Dans quel programme étiez-vous inscrit lors de la première vague de la pandémie de SARS-CoV2 (COVID19) au printemps 2020?
   1. Chirurgie cardiaque
   2. Chirurgie générale
   3. Chirurgie plastique
   4. Chirurgie orthopédique
   5. Chirurgie vasculaire
   6. Gynéco-obstétrique
   7. Neurochirurgie
   8. Ophtalmologie
   9. Oto-rhino-laryngologie
   10. Urologie
   11. J’étais absent de mon programme durant cette période.
4. Considérez-vous que vos activités cliniques et opératoires ont été modifiées lors de la première vague de la pandémie de SARS-CoV2 (COVID19) au printemps 2020?
   1. Oui, elles ont été modifiées à la baisse.
   2. Oui, elles ont été modifiées à la hausse.
   3. Non, aucun changement n’a eu lieu.
5. Considérez-vous que le temps octroyé aux activités pédagogiques et opportunités d’enseignement a été modifié lors de la première vague de la pandémie de SARS-CoV2 (COVID19) au printemps 2020? *La définition d’activité pédagogique comprend toute forme d’enseignement formel (cours) ou informel (capsule enseignement) en dehors du bloc opératoire*.
   1. Oui, elles ont été modifiées à la baisse.
   2. Oui, elles ont été modifiées à la hausse.
   3. Non, il n’y a eu aucun changement.
6. Quelle est la moyenne d’heures par semaine d’activité d’enseignement pour votre année de résidence dans votre programme dans un contexte usuel (hors pandémie) ?
7. Quelle est la moyenne d’heure par semaine d’activité d’enseignement pour votre année de résidence dans votre programme lors de la première vague de la pandémie de SARS-CoV2 (COVID19) au printemps 2020 ?
8. Croyez-vous qu’il serait pertinent que toutes les activités pédagogiques formelles soient obligatoires (temps protégé) pour tous les résidents de votre programme durant une période avec activité clinique réduite similaire à ce que vous avez vécu lors de la première vague de la pandémie de SARS-CoV2 (COVID19) au printemps 2020?
   1. Oui
   2. Non
   3. Incertain
9. Inscrivez les trois activités pédagogiques les plus formatrices et profitables qui ont eu lieu pendant la période de pandémie et mentionner si l’activité était virtuelle (ex. *journal club* virtuel, cours formel du programme virtuel, examen oral présentiel) ?
10. Inscrivez une activité pédagogique moins formatrice et profitable ayant eu lieu pendant la période de pandémie et la raison pour laquelle elle l’était moins. Mentionner si l’activité était virtuelle (ex. *journal club* virtuel, cours formel du programme virtuel, examen oral présentiel).
11. Est-ce qu’il y a des activités ou méthodes pédagogiques nouvelles vécues durant la pandémie que vous croyez pertinente à implanter pour améliorer votre formation lors de la première vague de pandémie au printemps 2020 ? Si oui, les décrire.
12. Les interactions sociales qui ont lieu pendant des activités d’enseignement en présentiel sont importantes.
    1. Fortement d’accord
    2. D’accord
    3. Neutre
    4. En désaccord
    5. Fortement en désaccord
13. Les opportunités d’apprentissage et d’enseignement sont restreintes lors de l’utilisation d’une plateforme virtuelle.
    1. Fortement d’accord
    2. D’accord
    3. Neutre
    4. En désaccord
    5. Fortement en désaccord
14. Les réunions virtuelles sont plus engageantes que les réunions en présentiel.
    1. Fortement d’accord
    2. D’accord
    3. Neutre
    4. En désaccord
    5. Fortement en désaccord
15. L’enseignement didactique en ligne est préférable aux cours en présentiel.
    1. Fortement d’accord
    2. D’accord
    3. Neutre
    4. En désaccord
    5. Fortement en désaccord
16. Vous arrive-t-il de faire une autre activité (pédagogique ou pas) lors d’un cours virtuel ?
    1. Oui, toujours
    2. Oui, occasionnellement
    3. Oui, rarement
    4. Non
17. L’assimilation du contenu du cours est meilleure lorsque l’enseignement est prodigué via une plateforme virtuelle.
    1. Fortement d’accord
    2. D’accord
    3. Neutre
    4. En désaccord
    5. Fortement en désaccord
